# Supplementary material for: The Physiological Functions of AbrB on Sporulation, Biofilm Formation and Carbon Source Utilization in Clostridium tyrobutyricum
Source: MDPI journal article supplement (doi:10.3390/bioengineering9100575), 2022-10-19
Supplement: s1 [file s1]

## Supplementary Material

**Supplementary Table S1.** Strains, plasmids and primers used in this study

| Strains/Plasmids/Primers                | Description                                               | Source               |
|-----------------------------------------|-----------------------------------------------------------|----------------------|
| <b>Strains</b>                          |                                                           |                      |
| <i>E. coli</i> CA434                    | Donor cells for conjugation transformation                | [34]                 |
| <i>Ct</i>                               | ATCC 25755                                                | [27]                 |
| pcloneEZ- <i>Plac</i> -repeat           | Used for <i>Plac</i> promoter amplification               | Stored in laboratory |
| pcloneEZ-repeat-                        | Used for terminator amplification                         | Stored in laboratory |
| <i>Ct</i> /Δ <i>abrB</i>                | ATCC 25755 with pM3/Δ <i>abrB</i>                         | This study           |
| <i>Ct</i> /Δ <i>abrB</i>                | ATCC 25755 with pM2/Δ <i>abrB</i>                         | This study           |
| <i>Ct</i> /Δ <i>abrB</i> -Δ <i>abrB</i> | <i>Ct</i> /Δ <i>abrB</i> with pM2/Δ <i>abrB</i>           | This study           |
| <i>Ct</i> /Δ <i>spo0A</i>               | ATCC 25755 with pM3/Δ <i>spo0A</i>                        | This study           |
| <i>Ct</i> /Δ <i>sigF</i>                | ATCC 25755 with pM3/Δ <i>sigF</i>                         | This study           |
| <i>Ct</i> /Δ <i>sigE</i>                | ATCC 25755 with pM3/Δ <i>sigE</i>                         | This study           |
| <i>Ct</i> /Δ <i>sigG</i>                | ATCC 25755 with pM3/Δ <i>sigG</i>                         | This study           |
| <i>Ct</i> /Δ <i>sigK</i>                | ATCC 25755 with pM3/Δ <i>sigK</i>                         | This study           |
| <b>Plasmids</b>                         |                                                           |                      |
| pMTL82151                               | ColE1 ori; Cm <sup>R</sup> ; pBP1 ori; <i>TarJ</i>        | [63]                 |
| pMTL82151-Em                            | ColE1 ori; Em <sup>R</sup> ; pBP1 ori; <i>TarJ</i>        | Stored in laboratory |
| pMTL83151                               | ColE1 ori; Cm <sup>R</sup> ; pBP1 ori; <i>TarJ</i>        | Stored in laboratory |
| pM3/Δ <i>abrB</i>                       | From pMTL83151; <i>Plac</i> -Δ <i>abrB</i>                | This study           |
| pM2/Δ <i>abrB</i>                       | From pMTL82151-Em; <i>Pcat1</i> -Δ <i>abrB</i>            | This study           |
| pM3/Δ <i>spo0A</i>                      | From pMTL83151; <i>Plac</i> -Δ <i>spo0A</i>               | This study           |
| pM3/Δ <i>sigF</i>                       | From pMTL83151; <i>Plac</i> -Δ <i>sigF</i>                | This study           |
| pM3/Δ <i>sigE</i>                       | From pMTL83151; <i>Plac</i> -Δ <i>sigE</i>                | This study           |
| pM3/Δ <i>sigG</i>                       | From pMTL83151; <i>Plac</i> -Δ <i>sigG</i>                | This study           |
| pM3/Δ <i>sigK</i>                       | From pMTL83151; <i>Plac</i> -Δ <i>sigK</i>                | This study           |
| <b>Primers</b>                          |                                                           |                      |
| <i>Pcat1</i> -F                         | gaaacagctatgaccgcgccgcGTAGACTTTAAGGATGGAACCTTTGA          |                      |
| Pro-F                                   | TGAAGTACATCACCGACGAGCAAG                                  |                      |
| Pro-R                                   | TGCTGCAAGGCGATTAAGTTGGGT                                  |                      |
| <i>Plac</i> -F                          | gaaacagctatgaccGCGGCCGCTTATATACTTGTTTATTTACTTGATTAT       |                      |
| <i>Plac</i> -repeat( <i>abrB</i> )-s-R  | agatacatgctggttcataatttcttaataATTTAAATACATCTCATGTAAAGGTTT |                      |
| spacer( <i>abrB</i> )-pb-F              | aatatgaaccagcatgtatcttctgGTTGAACCTTAACATGAGATGTATT        |                      |
| spacer( <i>abrB</i> )-term-R            | gaaatataggagctcATAAAAAAATTGTAGATAAACTATTTTATA             |                      |
| <i>abrB</i> -H1-F                       | ctacaattttttatgagctcCTATATTTCCATCATATATAAAATCTGC          |                      |
| <i>abrB</i> -H1-R                       | gtttttacagaagaaggtaccTTATTTTCCTCCCTAAGTTCCA               |                      |

Supplementary Table S1. Cont.

| Strains/Plasmids/Primers        | Description                                                | Source |
|---------------------------------|------------------------------------------------------------|--------|
| <i>abrB</i> -H2-F               | ggaaaataaggtaccTTCTTCTGTAAAAACAGGCTATTT                    |        |
| <i>abrB</i> -H2-R               | tctccatggacgcgtgacgtcCGGCACCTAGAATTCAATCA                  |        |
| <i>abrB</i> -conf-F             | AAGCTCTCCTTAGATACTGATTTAATTATTT                            |        |
| <i>abrB</i> -conf-R             | CTACACAAACTAAATTAATAGCAGATTTAGAC                           |        |
| <i>Pcat1</i> ( <i>abrB</i> )-R  | tcttacaacacctgttgatttcatAAAAACCACCCTTTCATAAATTA            |        |
| <i>abrB</i> -F                  | aaagggtgggttttgcggccgcATGAAATCAACAGGTGTTGTAAGA             |        |
| <i>abrB</i> -R                  | tctccatggacgcgtgacgtcTTATCTTCCTTCTTTTAATTCATTTA            |        |
| Plac-repeat( <i>spo0A</i> )-s-R | taatagtagtgagagcaagaaacgggtatATTTAAATACATCTCATGTTAAGGTTTC  |        |
| spacer( <i>spo0A</i> )-pb-F     | ttcttgctctcactactattagctatatcaGTTGAACCTTAACATGAGATGTATTAA  |        |
| spacer( <i>spo0A</i> )-term-R   | gcttctaagtcctatgagctcATAAAAAAATTGTAGATAAAACTATTTTATAAA     |        |
| <i>spo0A</i> -H1-F              | ttttttatgagctcATAGGACTTAGAAGCGAAATAAAAGAAG                 |        |
| <i>spo0A</i> -H1-R              | attgatatactttatctagaATATTTTACTCCCCTTTTATTAATAAATTCC        |        |
| <i>spo0A</i> -H2-F              | gtaaaatattctagaTAAAGTGATATCAATGGTTAACAGGTTT                |        |
| <i>spo0A</i> -H2-R              | acgacggccagtgccaagcttGTTATCTGTGATTTCCGGTATTCTATTATTC       |        |
| <i>spo0A</i> -conf-F            | CCCAGTGC GGAGTATTTGGTA                                     |        |
| <i>spo0A</i> -conf-R            | ATTATCGTGTAGTCCCTAAATTCGTG                                 |        |
| Plac-repeat( <i>sigF</i> )-s-R  | tctatcaagagaactgggtctccatcatccATTTAAATACATCTCATGTTAAGGTTTC |        |
| spacer( <i>sigF</i> )-pb-F      | agcaccagttctcttgatagataagGTTGAACCTTAACATGAGATGTATT         |        |
| spacer( <i>sigF</i> )-term-R    | gtcatacaccgagctcATAAAAAAATTGTAGATAAAACTATTTTATA            |        |
| <i>sigF</i> -H1-F               | ctacaattttttatgagctcGGTGTATGACAGCGTTGAGC                   |        |
| <i>sigF</i> -H1-R               | acgaaacctacttatggatccATTATTCACCTAACTTAATGATTTAAAA          |        |
| <i>sigF</i> -H2-F               | gggtgaataatggatccATAAGTAGGTTTCGTAACATAAAAAATAT             |        |
| <i>sigF</i> -H2-R               | tctccatggacgcgtgacgtcGCCTTCTGGAGTTGTAAGTGA                 |        |
| <i>sigF</i> -conf-F             | GGATAGTTCAGGCATAGGTGTT                                     |        |
| <i>sigF</i> -conf-R             | TTAACTCCCTACTACTCCGCTT                                     |        |
| Plac-repeat( <i>sigE</i> )-s-R  | tgtaccactgatatacaaatcttctacatATTTAAATACATCTCATGTTAAGGTTTC  |        |
| spacer( <i>sigE</i> )-pb-F      | atttgatatcagtggtgacaataggGTTGAACCTTAACATGAGATGTATT         |        |
| spacer( <i>sigE</i> )-term-R    | cctaagagccggtaccATAAAAAAATTGTAGATAAAACTATTTTATA            |        |
| <i>sigE</i> -H1-F               | ctacaattttttatgggtaccGGCTCTTAGGCTCTATTATGATT               |        |
| <i>sigE</i> -H1-R               | atactaaagacatgcggatccAATTTTCCTCCAATTAATCATAGT              |        |
| <i>sigE</i> -H2-F               | aggaaaattggatccGCATGTCTTTAGTATAAAATATAGCAT                 |        |
| <i>sigE</i> -H2-R               | tctccatggacgcgtgacgtcCTCTAGCTTGAAGTGCCTTATAA               |        |
| <i>sigE</i> -conf-F             | TTGCATATTTATAATGTATTCTATGCT                                |        |
| <i>sigE</i> -conf-R             | AATGATACTGGATCTTGAATTGC                                    |        |
| Plac-repeat( <i>sigG</i> )-s-R  | attgctttataagaccaacacatccgaccATTTAAATACATCTCATGTTAAGGTTTC  |        |
| spacer( <i>sigG</i> )-pb-F      | tggttggtcttataaaagcaatagatGTTGAACCTTAACATGAGATGTATT        |        |

Supplementary Table S1. *Cont.*

| Strains/Plasmids/Primers       | Description                                             | Source |
|--------------------------------|---------------------------------------------------------|--------|
| spacer( <i>sigG</i> )-term-R   | tatgttgccgagctcATAAAAAAATTGTAGATAAACTATTTTATA           |        |
| <i>sigG</i> -H1-F              | ctacaattttttatgagctcGGCAACATATGCATCCAGA                 |        |
| <i>sigG</i> -H1-R              | tacaatataaatataggtaccGCAATCAGCCCCTTTAGAA                |        |
| <i>sigG</i> -H2-F              | gctgattgcggtaccTATATTTATATTGTAAGTAATATTAATGGG           |        |
| <i>sigG</i> -H2-R              | tctccatggacgcgtgacgtcGGGCATTTCACTTCTCTTCA               |        |
| <i>sigG</i> -conf-F            | TACTGGAGTCAATGTAGAAGATTTG                               |        |
| <i>sigG</i> -conf-R            | ATAACTAATATAGGCAAGTCTTCAATT                             |        |
| Plac-repeat( <i>sigK</i> )-s-R | ttccccggataagaatattttttacaatgATTAAATACATCTCATGTTAAGGTTC |        |
| spacer( <i>sigK</i> )-pb-F     | aaaatattcttatccgggaaggatGTTGAACCTTAACATGAGATGTATT       |        |
| spacer( <i>sigK</i> )-term-R   | tcactactggagctcATAAAAAAATTGTAGATAAACTATTTTATA           |        |
| <i>sigK</i> -H1-F              | ctacaattttttatgagctcCAGTAGTGAATTCAGGTATATATGTAAAA       |        |
| <i>sigK</i> -H1-R              | ttaatcttaagaataggtaccAGCTGCTCCTCCTAATAGTGC              |        |
| <i>sigK</i> -H2-F              | ggagcagctggtaccTATTCTTAAGATTAAAAAATATATAAAAATTT         |        |
| <i>sigK</i> -H2-R              | tctccatggacgcgtgacgtcCCACATCCAGTTGGTCCTG                |        |
| <i>sigK</i> -conf-F            | TTGCATATTTATAATGTATTCTATGCT                             |        |
| <i>sigK</i> -conf-R            | TGTATCTTTACCTATTTCTCTTTGATT                             |        |

Note: Small letters are homologous sequences and capital letters are specific sequences. Underline marks are enzyme digestion sites

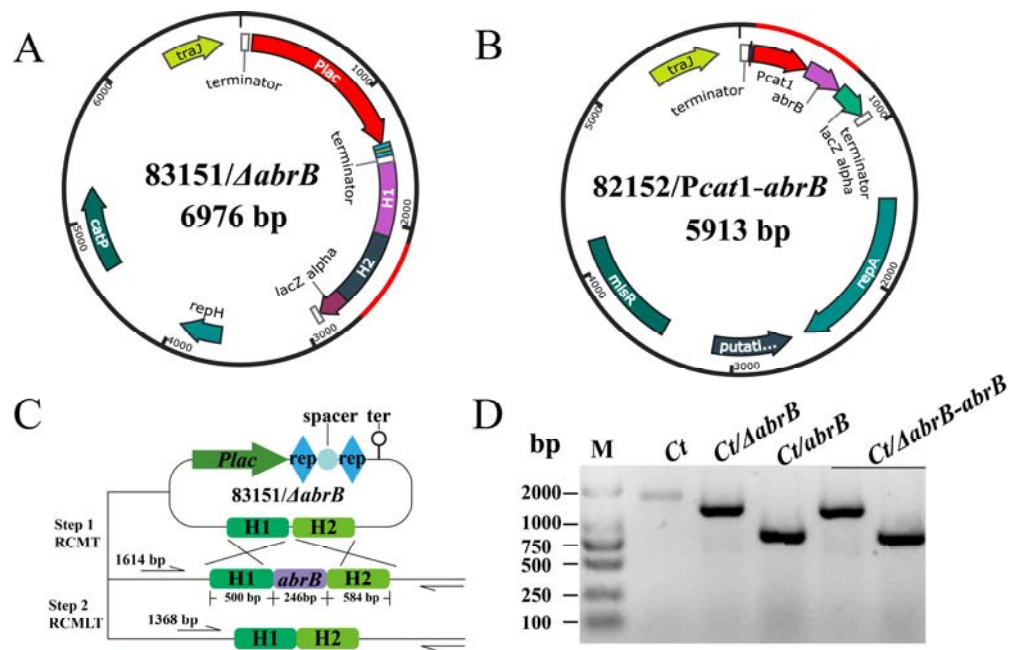

**Supplementary Figure S1** Construction and verification of the *Ct/ΔabrB*, *Ct/abrB* and *Ct/ΔabrB-abrB* strains. (A) The *abrB* knockout plasmid; (B) The *abrB* overexpression plasmid; (C) Schematic illustrating the work flow of *abrB* gene deletion using the lactose inducible CRISPR-Cas system. (D) Gel electrophoresis verification of *abrB* mutant. M: Marker.

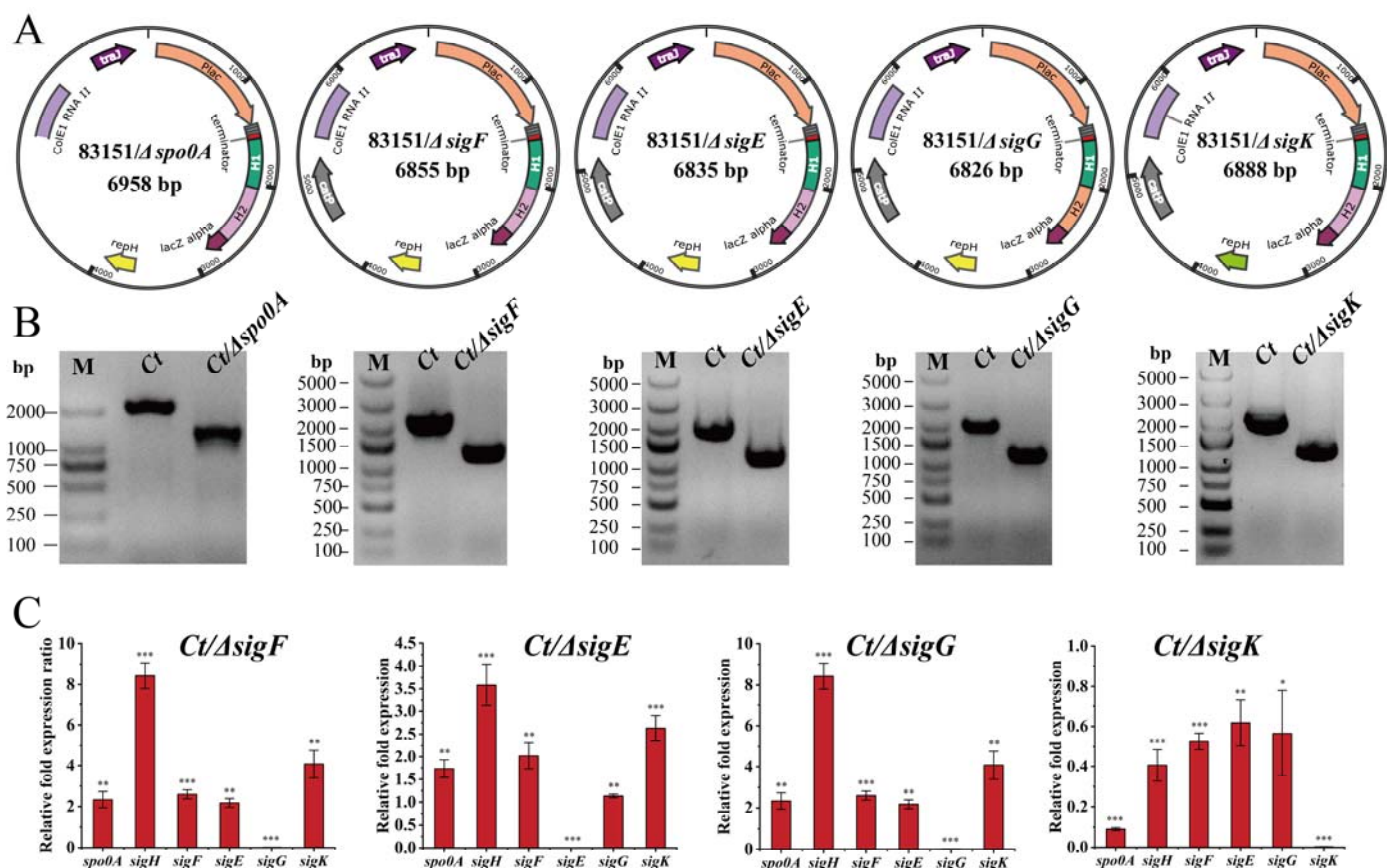

**Supplementary Figure S2** Construction of *Ct/Δspo0A* and *Ct/Δsigma* strains. (A) Construction of the knockout plasmid of *spo0A* and sigma factors; (B) Gel electrophoresis verification of *spo0A* and sigma factors mutant; (C) qRT-PCR analysis

of genes related to sporulation transcription levels at 72 h. (ns, non-significant; \*,  $p<0.05$ ; \*\*,  $p<0.01$ ; \*\*\*,  $p<0.001$ , t-test).
